# Supplementary material
Source: PubMed Central journal article supplement (PMC5639726)
Supplement: NIHMS890293-supplement-Support_information.pdf [file NIHMS890293-supplement-Support_information.pdf]

## Electronic Supplementary Material

# Targeting orthotopic gliomas with renal-clearable luminescent gold nanoparticles

Chuanqi Peng<sup>1</sup>, Xiaofei Gao<sup>2</sup>, Jing Xu<sup>1</sup>, Bujie Du<sup>1</sup>, Xuhui Ning<sup>1</sup>, Shaoheng Tang<sup>1</sup>, Robert M. Bachoo<sup>3</sup>, Mengxiao Yu<sup>1</sup>, Woo-Ping Ge<sup>2</sup> (✉), and Jie Zheng<sup>1</sup> (✉)

<sup>1</sup> Department of Chemistry and Biochemistry, The University of Texas at Dallas, Richardson, TX 75080, USA

<sup>2</sup> Children's Research Institute, Department of Pediatrics, Department of Neuroscience, Harold C. Simmons Comprehensive Cancer Center, UT Southwestern Medical Center, Dallas, TX 75390, USA

<sup>3</sup> Simmons Cancer Center, Annette G. Strauss Center for Neuro-Oncology, Department of Internal Medicine, Department of Neurology and Neurotherapeutics, UT Southwestern Medical Center, Dallas, TX 75390, USA

Supporting information to DOI 10.1007/s12274-017-1472-z

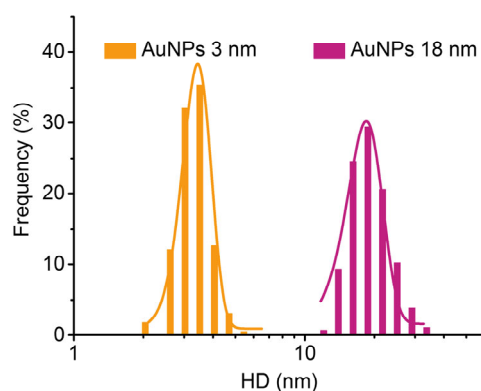

**Figure S1** Dynamic light scattering (DLS) analysis of AuNPs.

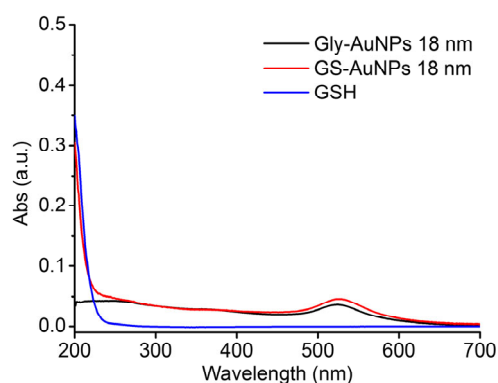

**Figure S2** Absorbance spectra of glycine-coated AuNPs (Gly-AuNPs) and glutathione-coated AuNPs (GS-AuNPs) with 18 nm size as well as GSH.

Address correspondence to Jie Zheng, [jiezheng@utdallas.edu](mailto:jiezheng@utdallas.edu); Woo-Ping Ge, [woo-ping.ge@utsouthwestern.edu](mailto:woo-ping.ge@utsouthwestern.edu)

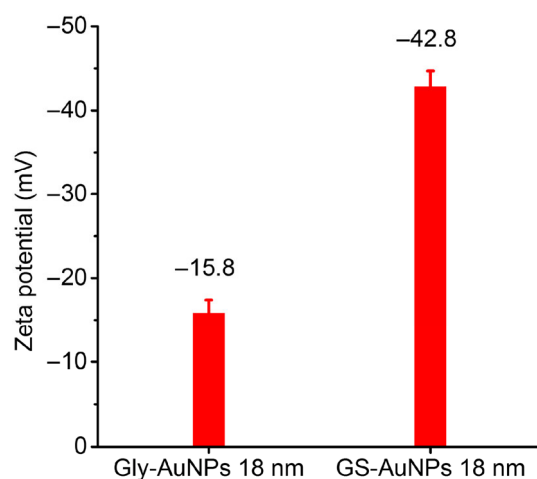

**Figure S3** Surface charge of 18 nm AuNPs before and after glutathione replacement, which was characterized as the zeta potential values of 18 nm Gly-AuNPs and GS-AuNPs.

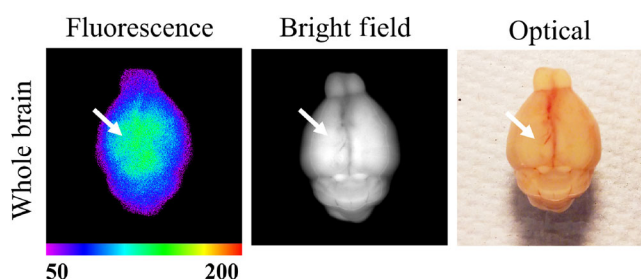

**Figure S4** Whole brain *ex vivo* fluorescence imaging for gliomas in early stage (3 to 5 mm), which showed limited positioning information.

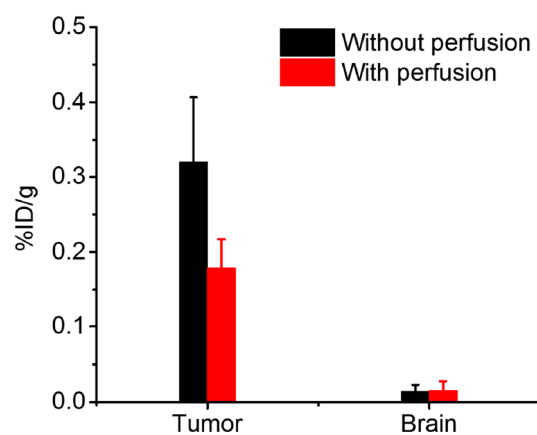

**Figure S5** Distribution of 3 nm AuNPs in tumor and normal brain tissues at 24 h p.i. with or without perfusion, respectively ( $n = 3$ ). The distribution of 3 nm AuNPs with perfusion was about 56.2% of that without perfusion, which means around 43.8% of AuNPs were removed by perfusion.
